# Supplementary material
Source: publisher site journal article supplement (https://www.dovepress.com/article/587338)
Supplement: Supplementary file 1 [file 587338_Supplementary%20materials.docx]

**Supplementary Table 1** Comparison of This Study with State-of-the-Art Techniques in the Field of MDR Prediction

| Reference (Year) | Core Model | Feature Processing | Calibration | Validation Strategy | Internal AUROC | External AUROC | Key Limitations |
| --- | --- | --- | --- | --- | --- | --- | --- |
| Zhao et al. (2025) | Multi-model comparison (RF, SVM, LR, NN; RF best) | Lasso + multivariate clinical & lab features | Calibration curve assessment | Train/test split (retrospective cohort) | RF AUC = 0.83 (best) | None (internal only) | Single-center retrospective; lacking external validation; generalizability unverified |
| Cui et al. (2025) | XGBoost (optimal) | 20 clinical + lab variables (SHAP explained) | Calibration curve evaluation | MIMIC-IV train/test split (internal) | XGBoost AUC = 0.831 | No independent external set | Single-database; VAP-specific limits generalization; no true external validation |
| This Study (2026) | Multi-model comparison (LR/RF/XGB/LightGBM; LR optimal) | Lasso + Chi-square dual screening + collinearity handling (final n=20) | Discrimination-preserving improved isotonic calibration | Internal stratified sampling + independent external validation (hosp_data) | LR 0.798 (optimal); RF 0.771; XGB 0.742,LGBM 0.715 | LR 0.845 (optimal) | Sample size to be expanded; multi-center validation needed |

**Abbreviations:** AUROC, area under the receiver operating characteristic curve; Lasso, least absolute shrinkage and selection operator; LightGBM, light gradient boosting machine; LR, logistic regression; MDR, multidrug resistance; MIMIC-IV, Medical Information Mart for Intensive Care IV; NN, neural network; RF, random forest; SHAP, Shapley additive explanations; SVM, support vector machine; VAP, ventilator-associated pneumonia; XGBoost, extreme gradient boosting.


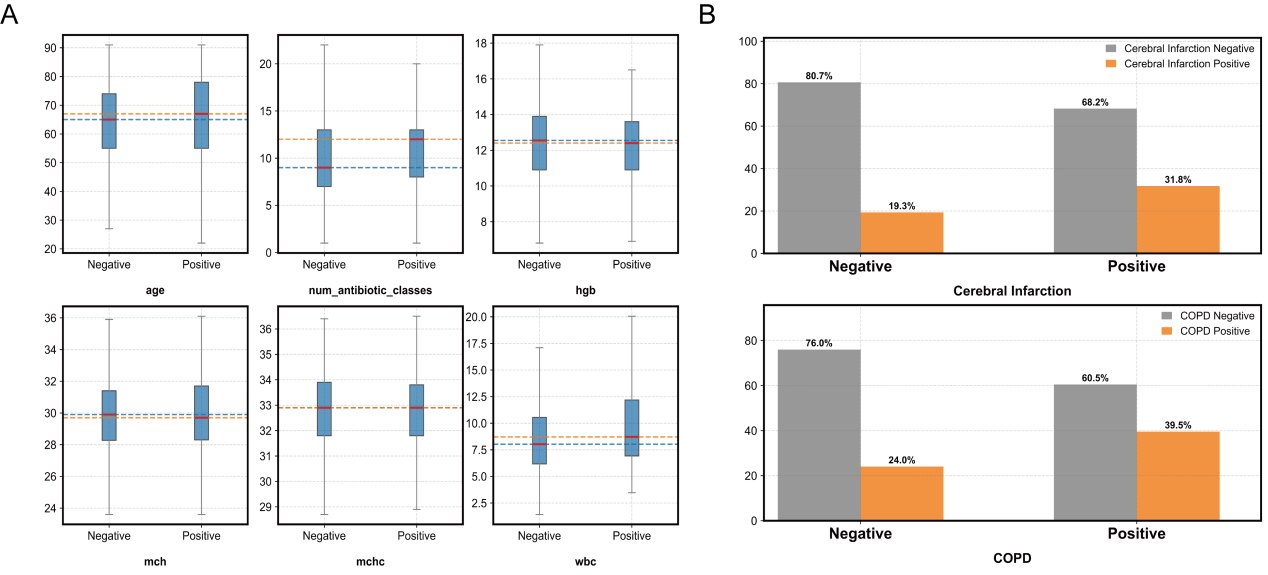


**Supplementary Figure 1** Distribution comparison of the screened candidate predictors between the MDRO group and non-MDRO group.

1. Box plots of continuous candidate predictors. The red solid line in each box indicates the median value of the variable, and the blue and orange dashed lines represent the overall mean level of the non-MDRO group and MDRO group, respectively. (**B**) Stacked bar plots of binary categorical predictors, showing the distribution proportion of cerebral infarction and chronic obstructive pulmonary disease (COPD) in the non-MDRO group (left) and MDRO group (right). Gray bars represent the negative category of the variable, and orange bars represent the positive category.
